# Supplementary material
Source: publisher figshare collection journal article supplement (https://gsapubs.figshare.com/ndownloader/files/23317652)
Supplement: Supplementary file 1 [file 23317652]

## Sheet: Table DR5
TABLE DR5. SIZE AND POPULATION DENSITY OF PLAGIOCLASE FROM THE BURNEY MOUNTAIN DACITE DOME COMPLEX USED FOR THE CRYSRAL-SIZE DISTRIBUTION PATTERNS
Dome	Sample
db1	B15DD025	size (mm)	0.71	0.564	0.448	0.356	0.282	0.224	0.178	0.142	0.112	0.0893	0.071	0.0564	0.0448	0.0356	0.0282	0.0224	0.0178	0.0142
		ln (population density)	-0.82	-0.42	0.41	1.89	3.13	4.48	5.66	7.08	8.1	8.7	9.15	9.59	10.07	10.55	10.99	11.59	12.06	11.98
	LC98-2321	size (mm)	0.564	0.448	0.356	0.282	0.224	0.178	0.142	0.112	0.0893	0.071	0.0564	0.0448	0.0356	0.0282	0.0224	0.0178	0.0142
		ln (population density)	-1.45	0.06	1.91	3.03	4.24	5.66	6.98	7.82	8.47	9.08	9.4	9.94	10.47	11.09	11.55	12.14	12.24
db2	B15DD029	size (mm)	0.356	0.282	0.224	0.178	0.142	0.112	0.0893	0.071	0.0564	0.0448	0.0356	0.0282	0.0224	0.0178	0.0142
		ln (population density)	1.37	3.32	4.64	5.86	7.08	8.17	8.88	9.65	10.15	10.77	11.31	11.85	12.4	12.91	12.66
	B16DD066	size (mm)	0.564	0.448	0.356	0.282	0.224	0.178	0.142	0.112	0.0893	0.071	0.0564	0.0448	0.0356	0.0282	0.0224	0.0178	0.0142
		ln (population density)	-0.53	1.28	2.39	3.66	4.79	5.76	6.87	7.9	8.74	9.45	10.25	10.88	11.53	12.07	12.59	13.04	13.04
db3	B15DD027	size (mm)	0.564	0.448	0.356	0.282	0.224	0.178	0.142	0.112	0.0893	0.071	0.0564	0.0448	0.0356	0.0282	0.0224	0.0178	0.0142
		ln (population density)	0.15	0.79	2.63	3.79	4.72	5.96	7.03	7.87	8.67	9.27	10.04	10.56	11.2	11.81	12.31	12.79	12.77
db4	B16DD067	size (mm)	0.893	0.71	0.564	0.448	0.356	0.282	0.224	0.178	0.142	0.112	0.0893	0.071	0.0564	0.0448	0.0356	0.0282	0.0224	0.0178	0.0142
		ln (population density)	-2.22	-1.44	0.36	1.58	2.99	3.74	4.44	5.36	5.85	6.56	7.42	8.46	9.44	10.24	10.93	11.65	12.2	12.67	12.61
db5	B16DD063	size (mm)	0.893	0.71	0.564	0.448	0.356	0.282	0.224	0.178	0.142	0.112	0.0893	0.071	0.0564	0.0448	0.0356	0.0282	0.0224	0.0178	0.0142
		ln (population density)	-3.32	-0.38	0.8	2.07	3.1	3.81	4.47	5.12	5.65	6.4	6.94	7.56	8.1	8.82	9.47	10.22	10.81	11.57	11.68
db6	B16DD060A	size (mm)	1.12	0.893	0.71	0.564	0.448	0.356	0.282	0.224	0.178	0.142	0.112	0.0893	0.071	0.0564	0.0448	0.0356	0.0282	0.0224	0.0178	0.0142
		ln (population density)	-3.81	-0.87	0.31	1.5	2	2.95	3.4	3.95	4.81	5.36	6.04	6.51	7.45	8	8.84	9.74	10.56	11.4	12.12	12.32
	B16DD060B	size (mm)	0.893	0.71	0.564	0.448	0.356	0.282	0.224	0.178	0.142	0.112	0.0893	0.071	0.0564	0.0448	0.0356	0.0282	0.0224	0.0178	0.0142
		ln (population density)	-2.14	0.09	1.56	2.07	2.89	3.53	4.31	4.67	5.57	6.22	6.91	7.65	8.41	9.34	10.35	11.3	12.18	12.88	12.74
	B16DD060C	size (mm)	0.893	0.71	0.564	0.448	0.356	0.282	0.224	0.178	0.142	0.112	0.0893	0.071	0.0564	0.0448	0.0356	0.0282	0.0224	0.0178	0.0142
		ln (population density)	-3	-1.48	0.37	1.57	2.77	3.31	4.66	5.23	6.05	6.7	7.43	8.01	8.74	9.46	10.22	10.99	11.63	12.2	12.32
	B16DD061A	size (mm)	0.893	0.71	0.564	0.448	0.356	0.282	0.224	0.178	0.142	0.112	0.0893	0.071	0.0564	0.0448	0.0356	0.0282	0.0224	0.0178	0.0142
		ln (population density)	-3.05	-0.2	1.26	2.05	2.95	3.51	4.5	5.21	5.63	6.35	7.06	7.68	8.27	8.91	9.61	10.14	10.79	11.37	11.44
Note: Image processing was done using ImageJ 1.51 software to obtain measurements of plagioclase crystals (with at least 500 per thin section) from 11 samples (with at least one sample from each dacite dome). The size (in mm) and population density were calculated using the CSDCorrections 1.53 package of Higgins (2000, 2002) in ImageJ 1.51. Whereas some crystals contain resorbed cores, their oute…
